# Supplementary material for: Clusterin regulates β-amyloid toxicity via Dickkopf-1-driven induction of the wnt–PCP–JNK pathway
Source: PubMed Central journal article supplement — Mol Psychiatry. 2012 Nov 20;19(1):88–98. doi: 10.1038/mp.2012.163 (PMC3873038; doi:10.1038/mp.2012.163), 2012-11-20
Supplement: mp2012163x1.pdf [file mp2012163x1.pdf]

**a**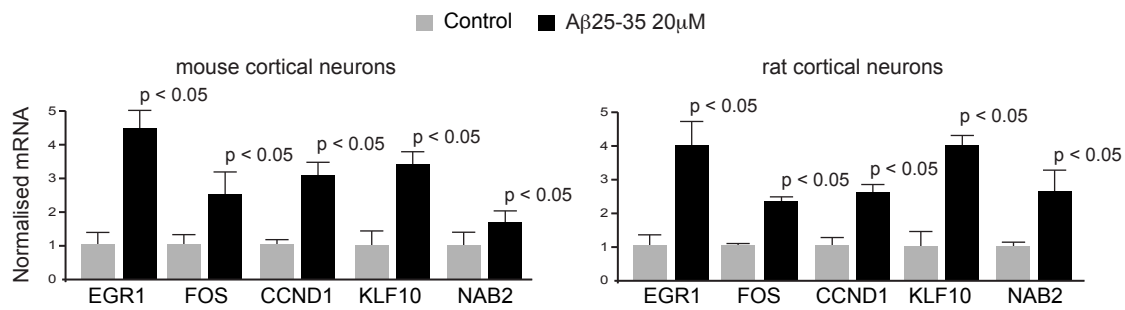**b**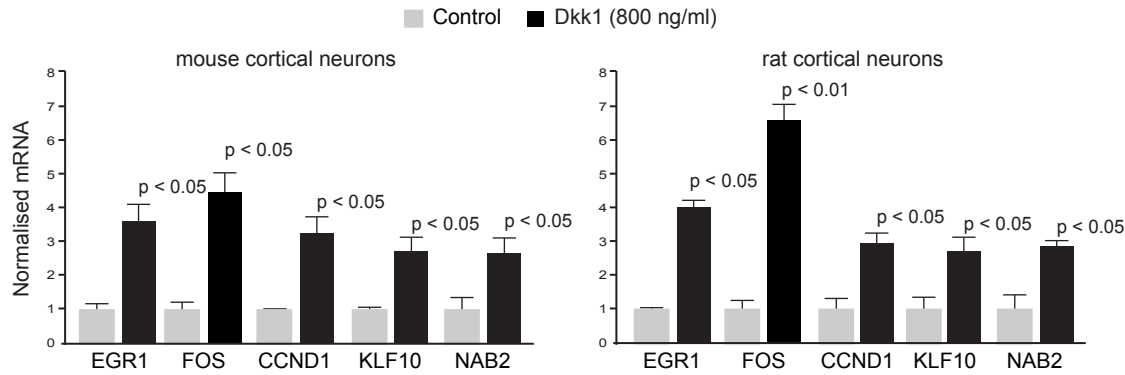**c**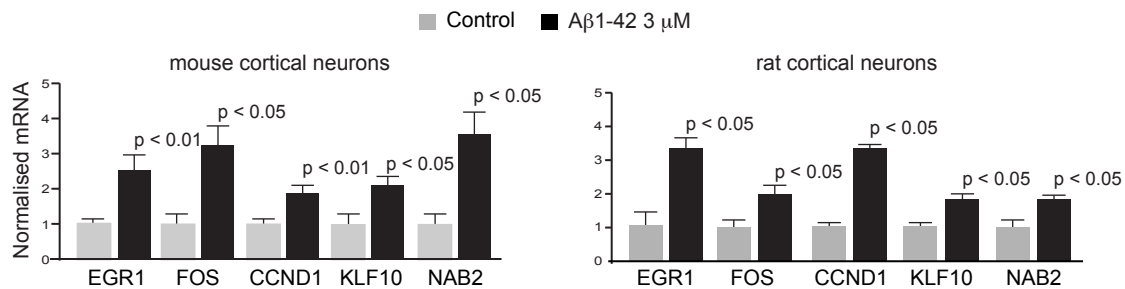**d**

Dickkopf-1 induction

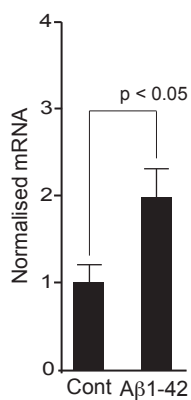**e**

Oligomeric Aβ1-42

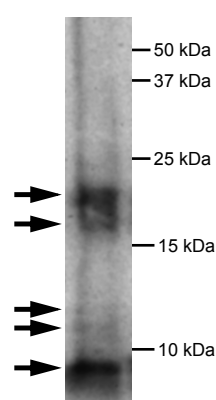**f**

Planar cell polarity pathway component genes

|         |        |          |        |
|---------|--------|----------|--------|
| ABL1    | DVL3   | NKD1     | ROR2   |
| ABL2    | FOS    | NKD2     | SCRIB  |
| ANKRD6  | FRAT2  | NLK      | SEMA6A |
| ANKS1B  | FZD3   | PLAU     | SEMA6B |
| APC2    | FZD6   | PLXNA1   | SEMA6C |
| ATP6AP2 | JUN    | PLXNA2   | SEMA6D |
| CELSR1  | KIF3A  | PLXNA3   | SFRP1  |
| CELSR2  | KIFAP3 | PLXNA4   | SFRP2  |
| CELSR3  | MAGI3  | PRICKLE1 | SFRP5  |
| CREB1   | MAP2K4 | PRICKLE2 | VANGL1 |
| CSNK1E  | MAP2K7 | PTEN     | VANGL2 |
| CTHRC1  | MAP3K1 | PTK7     | WNT11  |
| DAAM1   | MAP3K7 | RAC1     | WNT5A  |
| DAAM2   | MAPK10 | RHOA     | WNT5B  |
| DVL1    | MAPK8  | ROCK1    |        |
| DVL2    | MAPK9  | ROR1     |        |
